# Supplementary material for: Improvement of model evaluation by incorporating prediction and measurement uncertainty
Source: Copernicus journal article supplement (doi:10.5194/hess-2017-66), 2017-08-23
Supplement: Supplementary file 1 [file hess-2017-66-supplement.pdf]

**Table S1.** The proof for the rationality of topological distance D.

| objective                                | implementation                                                                                     | constraints                                                                                                                      |
|------------------------------------------|----------------------------------------------------------------------------------------------------|----------------------------------------------------------------------------------------------------------------------------------|
| The definition of D                      | Defined $\forall f \in A$                                                                          | the changing of it ( $f$ ) is denoted by $g$ ;                                                                                   |
| The definition of g                      | $f'(x) = \begin{cases} 0 & (x < x_1) \\ f(x) & (x_1 \leq x \leq x_2) \\ 1 & (x > x_2) \end{cases}$ | $\exists x_1, x_2 \in R, f(x) = 0$ and $f(x) = 1$ , then $(x_1 < x_2)$ ;                                                         |
|                                          | $f'(x) = \begin{cases} 0 & (x < x_1) \\ f(x) & (x \geq x_1) \end{cases}$                           | $\exists x_1 \in R, f(x) = 0$ and $\exists! x_2 \in R, f(x) = 1$ ;                                                               |
|                                          | $f'(x) = \begin{cases} f(x) & (x \leq x_2) \\ 1 & (x > x_2) \end{cases}$                           | $\exists x_2 \in R, f(x) = 1$ and $\exists! x_1 \in R, f(x) = 0$ ;                                                               |
|                                          | $f'(x) = f(x)$                                                                                     | $\exists! x_1, x_2 \in R, f(x) = 0$ and $f(x) = 0$ ;                                                                             |
| The definition of B                      | $B = \{h h = g(f(x))\}, B \neq \emptyset$                                                          | $h$ is a continuous function;                                                                                                    |
| The definition of Topological distance D | $D = \int_a^b  f_1 - f_2 $                                                                         | $a < b, a, b \in R$ , a and b are all real numbers <sup>a</sup> ;                                                                |
|                                          | $\forall D \notin \left\{ D \mid D = \int_a^b  f_1 - f_2  d_x, \forall f_1, f_2 \in B \right\}$    | $\exists m \in R; m > D$ (D is a limited value);                                                                                 |
| Proof of positive Definiteness           | $D(j - j) = 0$                                                                                     | $\forall j \in B,  j - j  = 0$ , then $D = \int_a^b  j - j  d_x = 0$ ;                                                           |
| Proof of symmetry                        | $D(j_1, j_2) = D(j_2, j_1)$                                                                        | $\forall j_1, j_2 \in B$ , then, $ j_1 - j_2  =  j_2 - j_1 $ ;                                                                   |
| Trigonometric inequality                 | $ j_1 - j_3  =  j_1 - j_2 + j_2 - j_3  \leq  j_1 - j_2  +  j_2 - j_3 $                             | $\forall j_1, j_2, j_3 \in B$ ;                                                                                                  |
|                                          | $D(j_1, j_3) \leq D(j_1, j_2) + D(j_2, j_3)$                                                       | $\int_a^b  j_1 - j_3  d_x \leq \int_a^b ( j_1 - j_2  +  j_2 - j_3 ) d_x$ $= \int_a^b  j_1 - j_2  d_x + \int_a^b  j_2 - j_3  d_x$ |

<sup>a</sup> where the values of a and b are as far from the origin as possible, thus the functions are integrated over a limited interval, and there are only small differences between the results and the results integrated for the real numbers R.
